# Supplementary material for: Efficacy of alirocumab according to background statin type and dose: pooled analysis of 8 ODYSSEY Phase 3 clinical trials
Source: PubMed Central journal article supplement (PMC5379546; doi:10.1038/srep45788), 2017-04-04
Supplement: srep45788-s1.pdf [file srep45788-s1.pdf]

---

## **Supplementary Material**

# **Efficacy of alirocumab according to background statin type and dose: pooled analysis of 8 ODYSSEY Phase 3 clinical trials**

**Alberico L. Catapano, L. Veronica Lee, Michael J. Louie, Desmond Thompson,  
Jean Bergeron, Michel Krempf**

**Supplementary Table 1.** Further details of statin dose usage

| Data are n (%)              |        | Pool 1 HIGH FH +<br>LONG TERM<br>(n=2448) |                | Pool 2 COMBO I +<br>FH I + FH II<br>(n=1051) |                | Pool 3 COMBO II +<br>OPTIONS I + OPTIONS<br>II<br>(n=1130) |                |
|-----------------------------|--------|-------------------------------------------|----------------|----------------------------------------------|----------------|------------------------------------------------------------|----------------|
| Statin                      | Dose   | ALI<br>(n=1625)                           | PBO<br>(n=823) | ALI<br>(n=699)                               | PBO<br>(n=352) | ALI<br>(n=686)                                             | EZE<br>(n=444) |
| <b>Moderate-dose statin</b> |        | 542 (33.4)                                | 271 (32.9)     | 108 (15.5)                                   | 43 (12.2)      | 208 (30.3)                                                 | 152 (34.2)     |
| Atorvastatin                | 20 mg  | 138 (8.5)                                 | 62 (7.5)       | 19 (2.7)                                     | 7 (2.0)        | 83 (12.1)                                                  | 66 (14.9)      |
|                             | 30 mg  | 2 (0.1)                                   | 0              | 0                                            | 0              | 1 (0.1)                                                    | 0              |
| Rosuvastatin                | 10 mg  | 66 (4.1)                                  | 34 (4.1)       | 14 (2.0)                                     | 5 (1.4)        | 61 (8.9)                                                   | 62 (14.0)      |
|                             | 15 mg  | 0                                         | 1 (0.1)        | 1 (0.1)                                      | 0              | 0                                                          | 0              |
| Simvastatin                 | 40 mg  | 332 (20.4)                                | 171 (20.8)     | 73 (10.4)                                    | 30 (8.5)       | 62 (9.0)                                                   | 22 (5.0)       |
|                             | 50 mg  | 0                                         | 1 (0.1)        | 0                                            | 0              | 0                                                          | 0              |
|                             | 60 mg  | 4 (0.2)                                   | 2 (0.2)        | 1 (0.1)                                      | 1 (0.3)        | 1 (0.1)                                                    | 2 (0.5)        |
| <b>Low-dose statin</b>      |        | 297 (18.3)                                | 151 (18.3)     | 47 (6.7)                                     | 26 (7.4)       | 47 (6.9)                                                   | 27 (6.1)       |
| Atorvastatin                | 5 mg   | 0                                         | 0              | 2 (0.3)                                      | 0              | 0                                                          | 0              |
|                             | 5.7 mg | 1 (0.1)                                   | 0              | 0                                            | 0              | 0                                                          | 0              |
|                             | 10 mg  | 67 (4.1)                                  | 33 (4.0)       | 7 (1.0)                                      | 3 (0.9)        | 5 (0.7)                                                    | 6 (1.4)        |
| Rosuvastatin                | 2.5 mg | 1 (0.1)                                   | 0              | 0                                            | 2 (0.6)        | 0                                                          | 0              |
|                             | 5 mg   | 22 (1.4)                                  | 10 (1.2)       | 11 (1.6)                                     | 6 (1.7)        | 9 (1.3)                                                    | 1 (0.2)        |
| Simvastatin                 | 5 mg   | 2 (0.1)                                   | 1 (0.1)        | 0                                            | 1 (0.3)        | 0                                                          | 0              |
|                             | 10 mg  | 45 (2.8)                                  | 21 (2.6)       | 3 (0.4)                                      | 3 (0.9)        | 5 (0.7)                                                    | 4 (0.9)        |
|                             | 20 mg  | 153 (9.4)                                 | 85 (10.3)      | 24 (3.4)                                     | 11 (3.1)       | 28 (4.1)                                                   | 16 (3.6)       |
|                             | 30 mg  | 6 (0.4)                                   | 1 (0.1)        | 0                                            | 0              | 0                                                          | 0              |

ALI, alirocumab, EZE, ezetimibe, PBO, placebo.

**Supplementary Table 2.** Absolute change from baseline in LDL-C at Week 24:  
Subgroup analysis by statin type and dose

| Study pool        | Subgroup | N   | Absolute change from baseline<br>LS mean (SE) |             |
|-------------------|----------|-----|-----------------------------------------------|-------------|
|                   |          |     | Control                                       | Alirocumab  |
| A) Atorvastatin   |          |     |                                               |             |
| ALI 150 vs PBO    | 10 mg    | 98  | -4.2 (6.1)                                    | -69.6 (4.3) |
|                   | 20 mg    | 195 | -8.2 (4.6)                                    | -70.9 (3.0) |
|                   | 40 mg    | 362 | -1.0 (3.3)                                    | -73.7 (2.3) |
|                   | 80 mg    | 264 | -4.6 (4.0)                                    | -76.2 (2.6) |
| ALI 75/150 vs PBO | 40 mg    | 140 | -1.7 (5.2)                                    | -67.6 (4.1) |
|                   | 80 mg    | 194 | 10.1 (4.6)                                    | -65.4 (3.3) |
| ALI 75/150 vs EZE | 20 mg    | 145 | -23.8 (4.2)                                   | -50.5 (3.7) |
|                   | 40 mg    | 260 | -25.6 (3.2)                                   | -55.8 (2.6) |
|                   | 80 mg    | 136 | -21.3 (4.8)                                   | -53.2 (3.4) |
| B) Rosuvastatin   |          |     |                                               |             |
| ALI 150 vs PBO    | 5 mg     | 30  | 6.6 (11.7)                                    | -75.1 (8.8) |
|                   | 10 mg    | 100 | -14.2 (6.6)                                   | -80.8 (4.7) |
|                   | 20 mg    | 213 | -9.3 (4.5)                                    | -80.3 (3.2) |
|                   | 40 mg    | 255 | -2.6 (3.9)                                    | -80.1 (3.0) |
| ALI 75/150 vs PBO | 20 mg    | 149 | -0.2 (5.9)                                    | -67.3 (3.8) |
|                   | 40 mg    | 302 | 11.1 (3.8)                                    | -63.8 (2.7) |
| ALI 75/150 vs EZE | 10 mg    | 121 | -21.5 (4.9)                                   | -56.3 (4.8) |
|                   | 20 mg    | 221 | -24.3 (3.9)                                   | -52.3 (3.2) |
|                   | 40 mg    | 49  | -21.4 (8.9)                                   | -53.9 (6.3) |
| C) Simvastatin    |          |     |                                               |             |
| ALI 150 vs PBO    | 10 mg    | 68  | 2.1 (7.0)                                     | -66.2 (4.8) |
|                   | 20 mg    | 233 | -1.7 (3.6)                                    | -73.0 (2.7) |

---

|                   |       |     |              |              |
|-------------------|-------|-----|--------------|--------------|
|                   | 40 mg | 495 | -4.2 (2.5)   | -74.6 (1.8)  |
|                   | 80 mg | 76  | -1.7 (5.8)   | -71.9 (5.0)  |
| ALI 75/150 vs PBO | 20 mg | 35  | -12.9 (10.6) | -51.8 (7.2)  |
|                   | 40 mg | 104 | -5.3 (6.2)   | -62.1 (4.1)  |
|                   | 80 mg | 30  | 13.5 (9.1)   | -54.1 (8.9)  |
| ALI 75/150 vs EZE | 20 mg | 44  | -20.1 (7.9)  | -42.0 (6.1)  |
|                   | 40 mg | 79  | -22.7 (6.6)  | -58.3 (4.1)  |
|                   | 80 mg | 15  | -19.8 (17.1) | -47.4 (10.1) |

---

ALI, alirocumab; EZE, ezetimibe; LDL-C, low-density lipoprotein cholesterol; LS, least squares; PBO, placebo; SE, standard error.
